# Supplementary material for: Boosting the performance of reversible solid oxide electrochemical cells with a novel hybrid oxygen electrode, Pr1.39Ba0.14Sr0.53Co1.48Fe0.76O6−δ-Ba0.66Sr0.34CoO3−δ
Source: Royal Society of Chemistry journal article supplement (doi:10.1039/d3ta03629d), 2023-01-01
Supplement: d3ta03629d1.pdf [file d3ta03629d1.pdf]

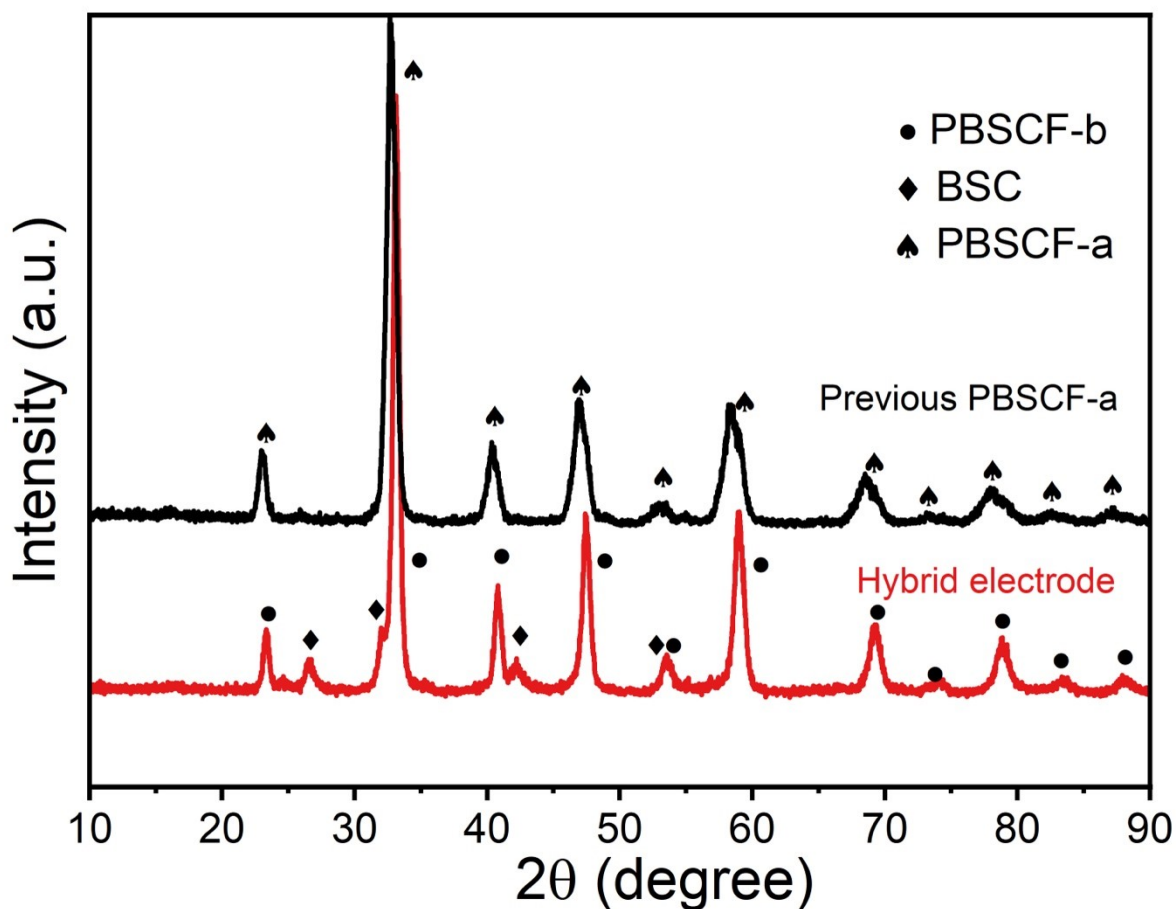

**Figure S1. XRD patterns of the previous PBSCF-a phase and the hybrid electrode.** The previous PBSCF-a is a single-phase double perovskite, which was synthesized by a wet chemistry method and sintered at 900 °C for 5 hours. The hybrid electrode consists of two phases, PBSCF-b and BSC, which was prepared by the same wet chemistry method and sintered at 750-770 °C.

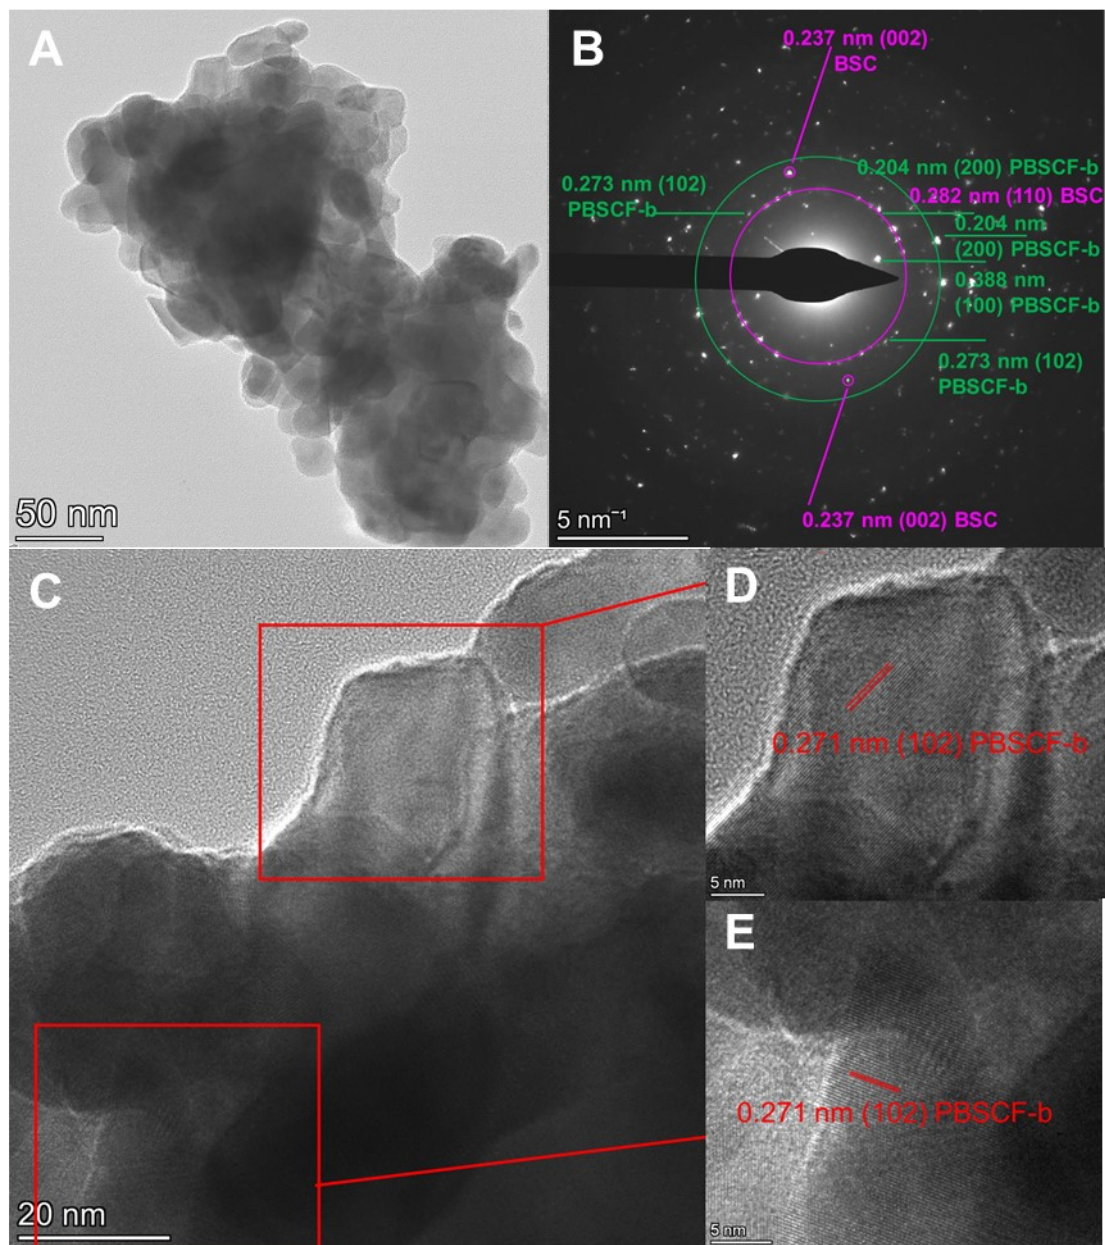

**Figure S2.** (A) TEM images of the hybrid electrode. (B) SAED patterns indicate the hybrid electrode is composed of the PBSCF-b phase and BSC phase. (C) HR-TEM image of the hybrid electrode grain and the zoomed-in areas: (D) and (E). The lattice fringes with the d-spacing of 0.271 nm, correspond to the (102) planes of the new PBSCF-b phase.

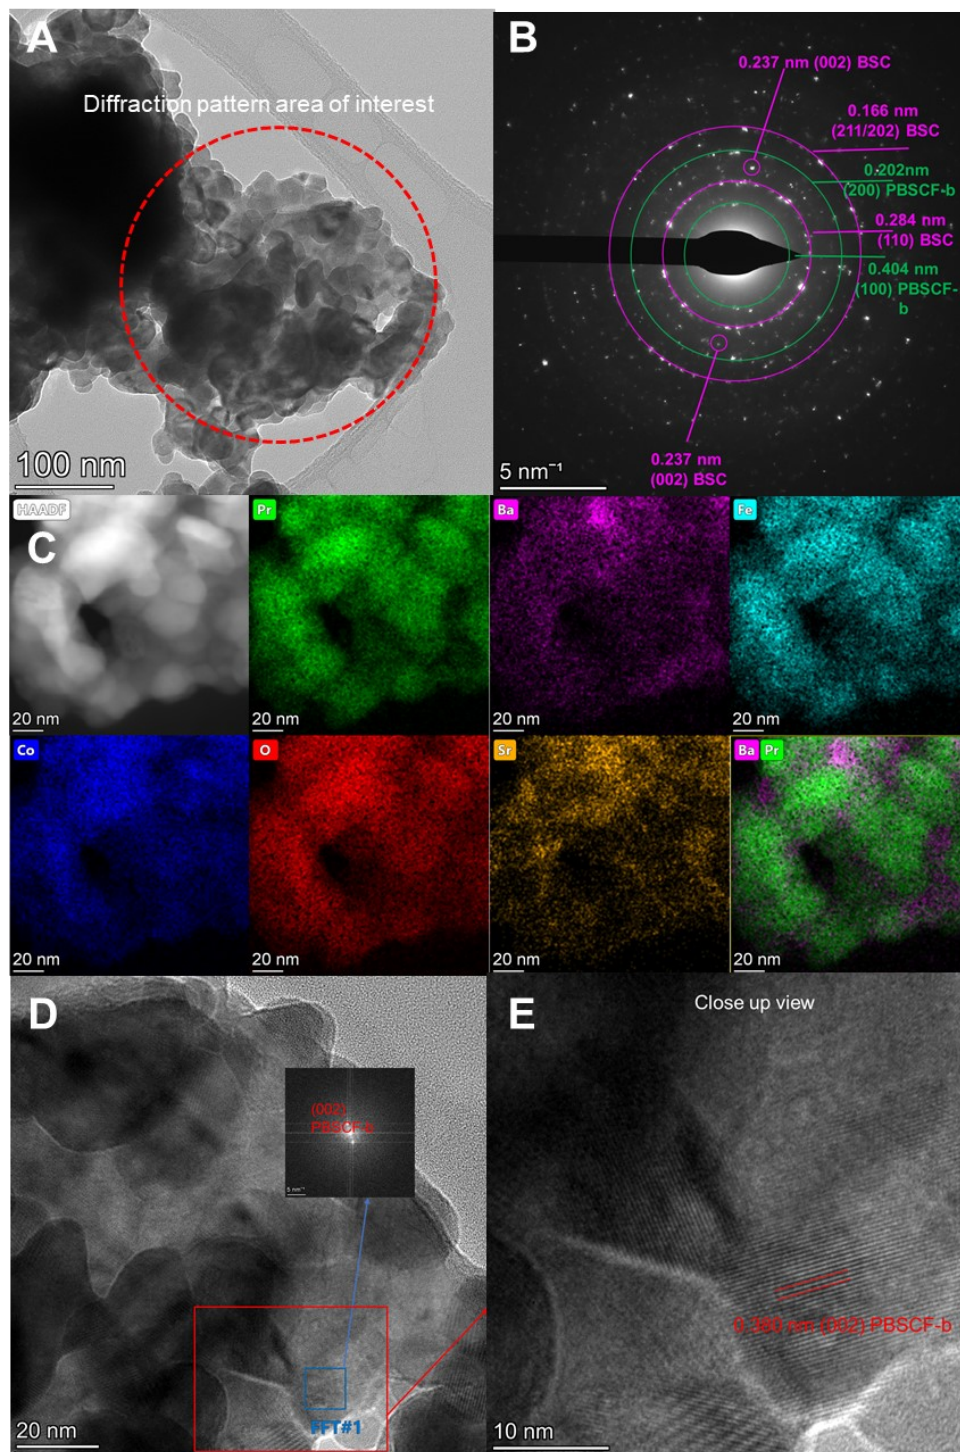

**Figure S3.** (A) Additional TEM images of the hybrid electrode. (B) Additional SAED patterns show the hybrid electrode is composed of a new PBSCF-b phase and the BSC phase. (C) EDS mapping images of the hybrid electrode show the BSC phase mainly contains Ba, Sr, Co, and O elements. (D) HR-TEM image of the hybrid electrode grain and the zoomed-in areas. (E) HR-TEM image shows lattice planes with d-spacing of 0.380 nm, corresponding to the (002) planes of the new PBSCF-b phase.

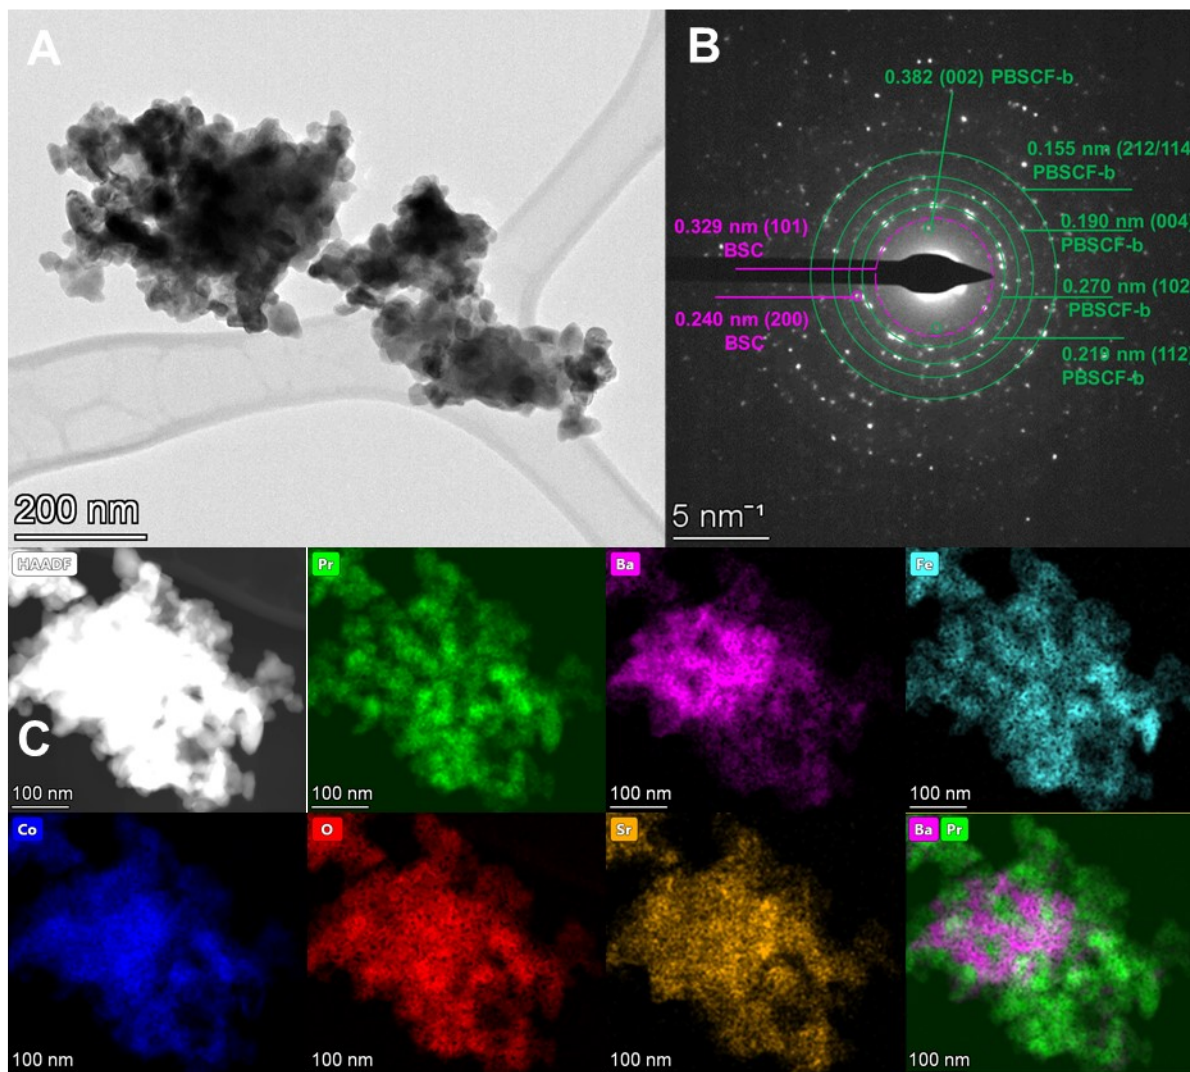

**Figure S4.** (A) TEM image of the hybrid electrode. (B) SAED patterns show the lattices with the d-spacings of 0.382 nm, 0.155 nm, 0.190 nm, 0.270 nm, and 0.219 nm, corresponding to the (002), (212/114), (004), (102/110), and (112) planes of PBSCF-b, respectively. And those with the d-spacing of 0.329 nm and 0.240 nm correspond to the (101) and (200) planes of BSC, respectively. (C) EDS mapping images of the hybrid electrode confirm that it is a composite of PBSCF-b and BSC phases.

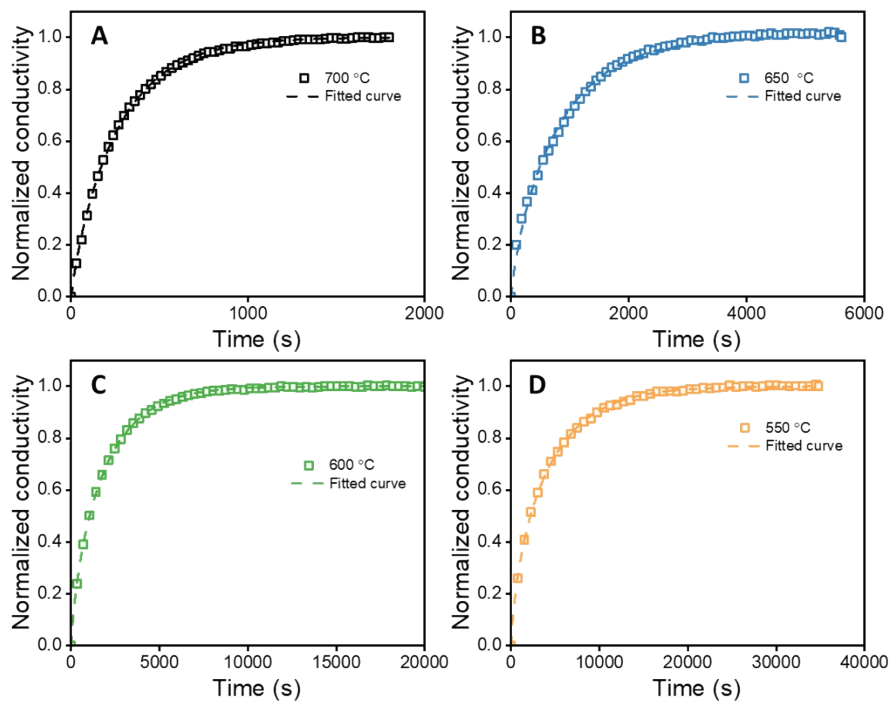

**Figure S5.** ECR experimental results and the fitted results for PBSCF-b coated with BSC at 550 °C, 600 °C, 650 °C, and 700 °C after changing the oxygen partial pressure from 2 vol.% (490 sccm Ar + 10 sccm O<sub>2</sub>) to 20 vol.% (400 sccm Ar + 100 sccm O<sub>2</sub>).

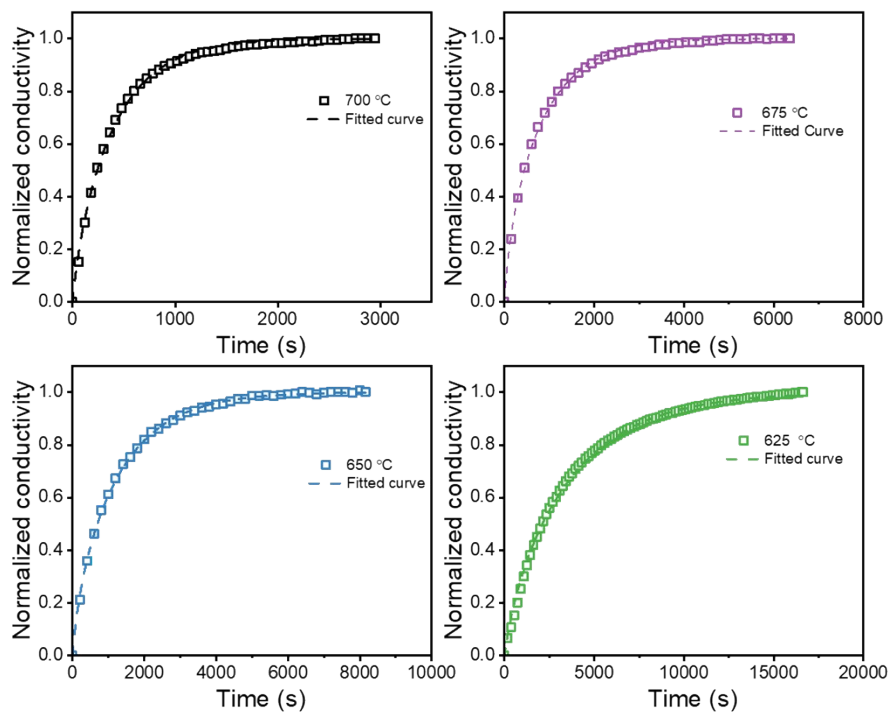

**Figure S6.** ECR experimental results and the fitted results for the previous PBSCF-a at 625 °C, 650 °C, 675 °C, and 700 °C after changing the oxygen partial pressure from 2 vol.% (490 sccm Ar + 10 sccm O<sub>2</sub>) to 20 vol.% (400 sccm Ar + 100 sccm O<sub>2</sub>).

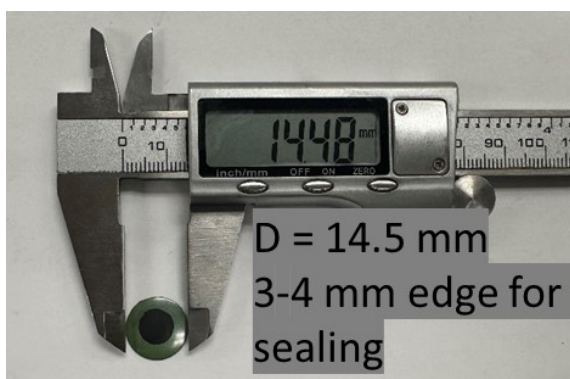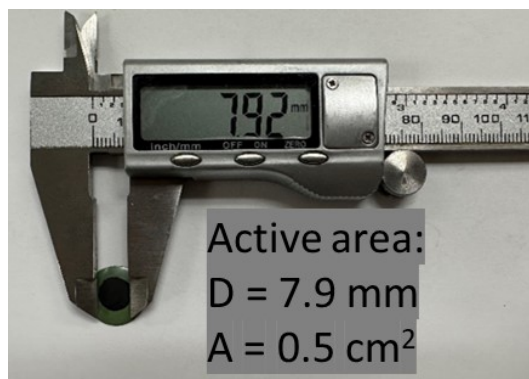

**Figure S7.** Photos of a representative fuel electrode-supported SOEC fabricated in this work to evaluate the oxygen electrodes. The oxygen electrode effective area is 0.5 cm<sup>2</sup>.

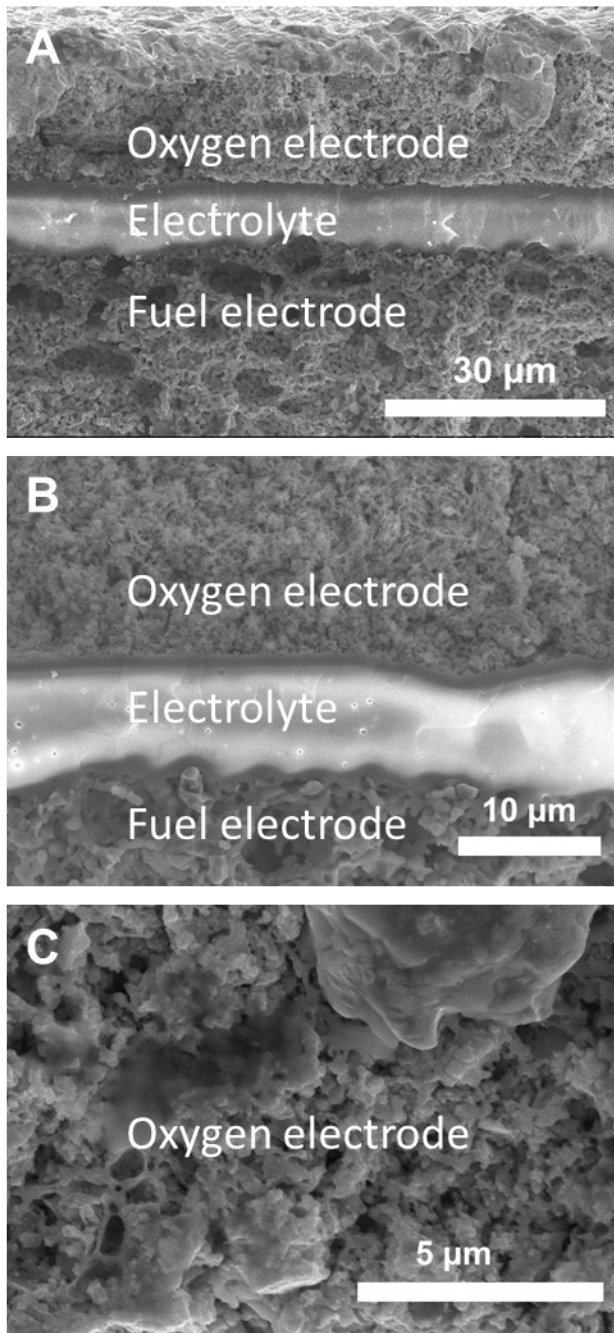

**Figure S8.** Representative SEM images of SOECs studied in this work, which are highly reproducible, highly uniform, and defect-free, and have dense electrolytes (thickness of electrolyte =  $\sim 8 \mu\text{m}$ ).



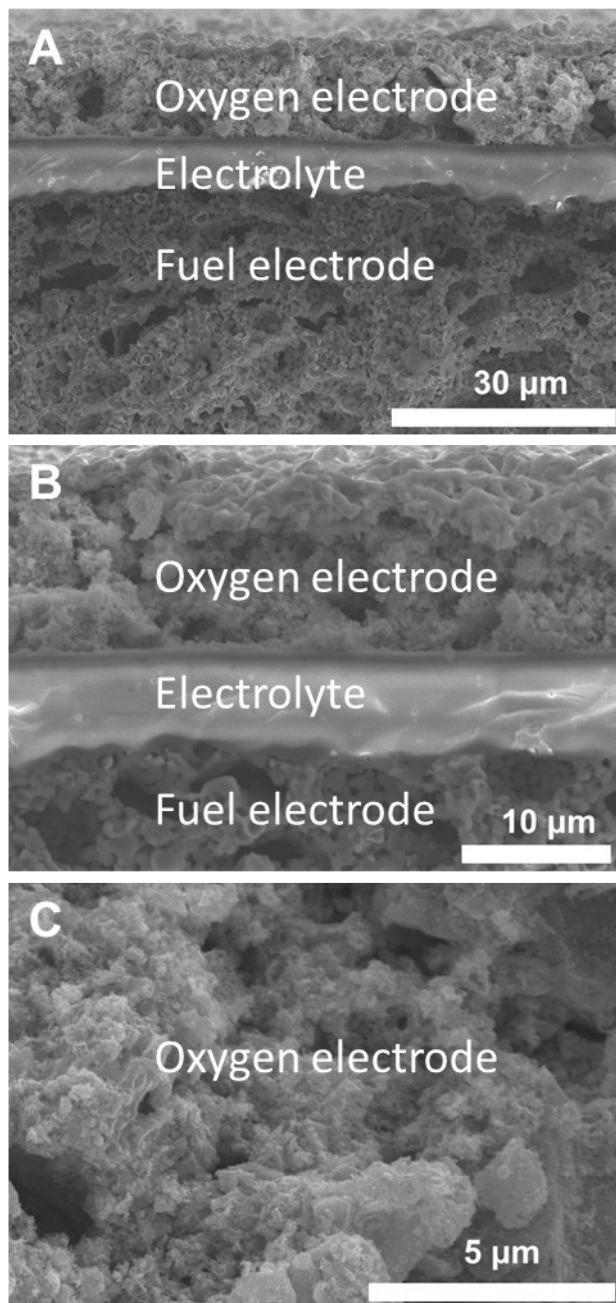

**Figure S9.** SEM images of the SOEC with PBSCF-b+BSC hybrid electrode after performance evaluation in steam electrolysis mode. No cracking or electrolyte-electrode delamination were observed.

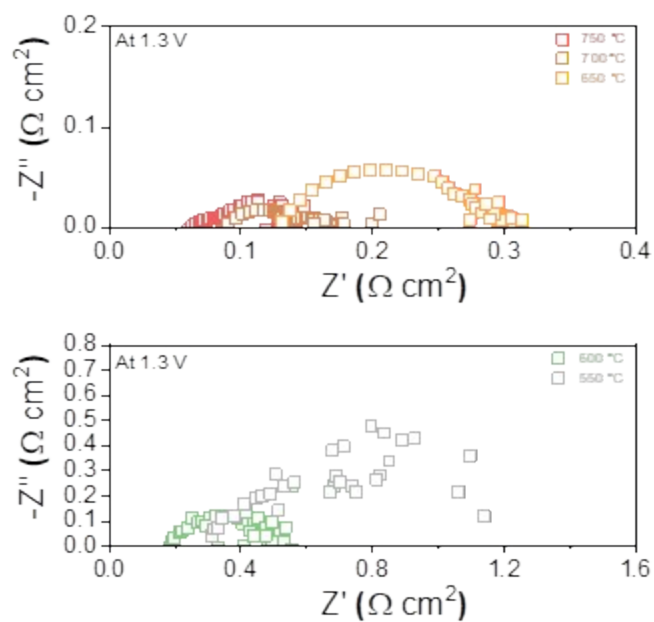

Figure S10. EIS spectra collected at an applied voltage of 1.3 V and an operating temperature ranging from 550 to 750 °C for SOEC with the hybrid electrode.

**Table S1.** Comparisons YSZ electrolyte-based SOEC performance.

| Half-cell configuration | Oxygen electrode materials              | Temperature (°C) | Current densities at 1.3 V (A cm <sup>-2</sup> ) | Literature |
|-------------------------|-----------------------------------------|------------------|--------------------------------------------------|------------|
| Ni-YSZ YSZ              | Hybrid electrode                        | 750              | 4.4                                              | This work  |
|                         |                                         | 700              | 2.3                                              |            |
|                         |                                         | 650              | 1.4                                              |            |
|                         |                                         | 600              | 0.9                                              |            |
|                         |                                         | 550              | 0.46                                             |            |
| Ni-YSZ YSZ GDC          | SSC-SDC                                 | 800              | 4.08                                             | 1          |
|                         |                                         | 750              | 3.13                                             |            |
|                         |                                         | 700              | 1.9                                              |            |
|                         |                                         | 650              | 1.1                                              |            |
| Ni-YSZ YSZ GDC          | STFC                                    | 800              | 3                                                | 2          |
|                         |                                         | 750              | 2.3                                              |            |
|                         |                                         | 700              | 1.5                                              |            |
|                         |                                         | 650              | 1                                                |            |
|                         |                                         | 600              | 0.6                                              |            |
| LSCFN55 YSZ             | SSNC                                    | 800              | 0.7                                              | 3          |
|                         |                                         | 750              | 0.45                                             |            |
| 430L YSZ SSZ            | SSZ-Nd <sub>2</sub> O <sub>3</sub> /NNO | 800              | 2.05                                             | 4          |
|                         |                                         | 750              | 1.62                                             |            |
|                         |                                         | 700              | 1.06                                             |            |
|                         |                                         | 650              | 0.6                                              |            |
| Ni-YSZ Ni-SSZ SSZ SNDC  | PBSCF-GDC                               | 750              | 2.1                                              | 5          |
|                         |                                         | 700              | 1.45                                             |            |
|                         |                                         | 650              | 0.94                                             |            |
|                         |                                         | 600              | 0.51                                             |            |
| Ni-YSZ YSZ              | LSM-DYSB                                | 700              | 1.32                                             | 6          |
|                         |                                         | 650              | 0.9                                              |            |
|                         |                                         | 600              | 0.47                                             |            |
| Ni-YSZ YSZ SNDC         | LSCF-SNDC                               | 750              | 1.37                                             | 7          |
|                         |                                         | 700              | 0.97                                             |            |
|                         |                                         | 650              | 0.58                                             |            |
| Ni-YSZ YSZ GDC          | LSCF-GDC                                | 800              | 2.75                                             | 8          |
|                         |                                         | 750              | 1.7                                              |            |
|                         |                                         | 700              | 1.25                                             |            |
|                         |                                         | 650              | 0.6                                              |            |
| Ni-YSZ YSZ              | LSM-YSB                                 | 800              | 1.52                                             | 9          |
|                         |                                         | 750              | 0.97                                             |            |
|                         |                                         | 700              | 0.7                                              |            |
|                         |                                         | 650              | 0.46                                             |            |
| Ni-YSZ YSZ GDC          | STFC-PrOx                               | 800              | 4.25                                             | 10         |
|                         |                                         | 750              | 3.6                                              |            |

|                |                        |     |      |    |
|----------------|------------------------|-----|------|----|
|                |                        | 700 | 2.9  |    |
|                |                        | 650 | 2.25 |    |
|                |                        | 600 | 1.25 |    |
|                |                        | 550 | 0.5  |    |
| Ni-YSZ YSZ GDC | PBFZr-GDC              | 700 | 2.14 | 11 |
| Ni-YSZ YSZ GDC | LSCF-GDC               | 750 | 2.1  | 12 |
| Ni-YSZ YSZ GDC | PBNF0.1                | 750 | 0.65 | 13 |
| Ni-YSZ YSZ     | PBSM3                  | 750 | 2.75 | 14 |
|                |                        | 700 | 1.85 |    |
| Ni-YSZ YSZ     | LSM-YSZ                | 700 | 0.40 | 15 |
| Ni-YSZ YSZ GDC | LSCF                   | 700 | 0.82 | 16 |
| Ni-YSZ YSZ     | LSCF-YSZ               | 750 | 0.91 | 17 |
| Ni-YSZ YSZ SDC | BSCF-SDC               | 750 | 0.23 | 18 |
| Ni-YSZ YSZ     | PNO                    | 700 | 0.28 | 19 |
| Ni-YSZ YSZ GDC | LSCF-GDC               | 750 | 0.34 | 20 |
| Ni-YSZ YSZ GDC | LSCF-GDC               | 750 | 0.77 | 21 |
| Ni-YSZ ScSZ    | Mn1.3Co1.3Cu0.4O4-ScSZ | 750 | 1.4  | 22 |
| Ni-YSZ YSZ GDC | LSFN-GDC               | 750 | 0.53 | 23 |
| Ni-YSZ YSZ GDC | BCO-PBCC               | 750 | 1.36 | 24 |

**Table S2.** Performance comparison of this work and other state-of-the-art YSZ anode-supported hydrogen-fueled SOFCs reported recently.

| Half-cell configuration | Oxygen electrode materials              | Peak power density at 750 °C (W cm <sup>-2</sup> ) | Literature |
|-------------------------|-----------------------------------------|----------------------------------------------------|------------|
| Ni-YSZ YSZ              | Hybrid electrode                        | 2.4                                                | This work  |
| Ni-YSZ YSZ GDC          | STFC                                    | 1.75                                               | 2          |
| Ni-YSZ YSZ GDC          | STFC-PrO <sub>x</sub>                   | 3                                                  | 10         |
| Ni-YSZ YSZ GDC          | LSCF-GDC-PrO <sub>x</sub>               | 2                                                  | 25         |
| Ni-YSZ YSZ              | LSCF-GDC                                | 1.6                                                | 26         |
| Ni-YSZ YSZ GDC          | LSF-GDC-Pr <sub>6</sub> O <sub>11</sub> | 1.57                                               | 27         |
| Ni-YSZ YSZ GDC          | PBFZr-GDC                               | 1.9                                                | 11         |
| Ni-YSZ YSZ GDC          | PBCC-GDC                                | 1.74                                               | 28         |
| Ni-YSZ YSZ              | SCP-GDC                                 | 1.4                                                | 29         |
| Ni-YSZ YSZ              | PBSCF-GDC                               | 1.37                                               | 29         |
| Ni-YSZ YSZ              | MCO-GDC                                 | 0.7                                                | 30         |
| Ni-YSZ YSZ              | CMO-SDC                                 | 0.64                                               | 31         |
| Ni-YSZ YSZ SDC          | BCFN/BCO-LSCF                           | 1.4                                                | 25         |
| Ni-YSZ YSZ GDC          | BSNM-SDC-Ag                             | 1.3                                                | 32         |
| Ni-YSZ YSZ GDC          | SSC-SDC                                 | 2.44                                               | 1          |
| Ni-YSZ YSZ ESB          | LSM-ESB                                 | 1.75                                               | 33         |
| Ni-YSZ YSZ GDC          | NBCCF@GDC                               | 1                                                  | 34         |

**Table S3.** XRD refinement results of the hybrid electrode material.

| Sample          | Phase       | Space group        | a, b, c (Å)      | $\alpha, \beta, \gamma$ (°) | Wt. frac. (%) | Chi   | wR <sub>p</sub> (%) | R <sub>p</sub> (%) | d-spacing                                                                    |
|-----------------|-------------|--------------------|------------------|-----------------------------|---------------|-------|---------------------|--------------------|------------------------------------------------------------------------------|
| New PBSCF-b+BSC | New PBSCF-b | Tetragonal; P4/mmm | 3.88, 3.88, 7.74 | 90, 90, 90                  | 89.5          | 1.978 | 13.68               | 11.04              | 0.195 nm, (200);<br>0.387 nm, (002);<br>0.273 nm, (102);<br>0.158 nm, (212); |
|                 | BSC         | Hexagonal; P63/mmc | 5.58, 5.58, 4.63 | 90, 90, 120                 | 10.5          |       |                     |                    | 0.279 nm, (110);<br>0.167 nm, (202);<br>0.169 nm, (211);<br>0.230 nm, (002); |

**Table S4.** Comparison in peak power densities at various temperature using different single cell configuration fueled by propane.

| Single cell configuration (fuel electrode  electrolyte  oxygen electrode) | Temperature (°C) | Peak power density (W cm <sup>-2</sup> ) | Literature |
|---------------------------------------------------------------------------|------------------|------------------------------------------|------------|
| Ni-YSZ YSZ Hybrid electrode                                               | 750              | 2.6                                      | This work  |
|                                                                           | 700              | 1.7                                      |            |
|                                                                           | 650              | 0.95                                     |            |
|                                                                           | 600              | 0.54                                     |            |
|                                                                           | 550              | 0.26                                     |            |
| RP-SFM-SDC LDC LSGM LSCF-SDC                                              | 800              | 0.7                                      | 35         |
|                                                                           | 750              | 0.35                                     |            |
| LSCrFeCo-GDC LDC LSGM LSCF-GDC                                            | 800              | 0.5                                      | 36         |
|                                                                           | 750              | 0.38                                     |            |
|                                                                           | 700              | 0.18                                     |            |
| L-PBMCO LDC LSGM NBSCF-GDC                                                | 800              | 0.33                                     | 37         |
| RP-PSFN-CFA LDC LSGM BCFN                                                 | 800              | 0.59                                     | 38         |
| PBMO LDC LSGM NBSCF-GDC                                                   | 800              | 0.75                                     | 39         |
|                                                                           | 750              | 0.3                                      |            |
|                                                                           | 700              | 0.17                                     |            |
| NTO-Ni-YSZ YSZ LSM-YSZ                                                    | 700              | 0.15                                     | 40         |
| BaO/Ni-YSZ YSZ SDC-LSCF                                                   | 750              | 0.9                                      | 41         |
| Ru-CeO <sub>2</sub>  PSZ Ni-YSZ YSZ LSCF-GDC                              | 750              | 0.48                                     | 42         |
|                                                                           | 700              | 0.385                                    |            |
| PSCFN-Co-Fe LSGM BCFN                                                     | 800              | 0.6                                      | 43         |
|                                                                           | 750              | 0.32                                     |            |
| RP-PSFR-FRA-GDC LSGM LSCF-GDC                                             | 800              | 0.5                                      | 44         |
|                                                                           | 750              | 0.25                                     |            |
|                                                                           | 700              | 0.12                                     |            |

**Table S5.** Crystal structure results obtained from TEM for the PBSCF-b phase.

| Mul ti. | (h,k,l) | d* / nm <sup>-1</sup> | Θ <sub>Scatt</sub> / Deg. | Inten s. | Θ <sub>Bragg</sub> / mRad | V <sub>r</sub> [V] nm  e] | V <sub>i</sub> [V] nm  e] | Ampli. [V] nm  e] | d / nm | LP factor | s  |
|---------|---------|-----------------------|---------------------------|----------|---------------------------|---------------------------|---------------------------|-------------------|--------|-----------|----|
| 1       | (0,0,0) | 0.000                 | 0.000                     |          | 0.000                     | 12.339                    | 0.935                     | 12.375            |        |           |    |
| 2       | (0,0,1) | 1.310                 | 0.189                     | 1        | 1.642                     | -0.154                    | 0.247                     | 0.291             | 0.764  | 0.7636    | 1  |
| 4       | (1,0,0) | 2.558                 | 0.368                     | 301      | 3.208                     | 4.917                     | 0.479                     | 4.940             | 0.391  | 0.3909    | 1  |
| 2       | (0,0,2) | 2.619                 | 0.377                     | 561      | 3.284                     | 9.623                     | 0.699                     | 9.649             | 0.382  | 0.3818    | 4  |
| 8       | (1,0,1) | 2.874                 | 0.413                     | 489      | 3.604                     | 4.695                     | 0.471                     | 4.719             | 0.348  | 0.348     | 2  |
| 4       | (1,1,0) | 3.617                 | 0.520                     | 1        | 4.536                     | 0.249                     | 0.256                     | 0.357             | 0.276  | 0.2764    | 2  |
| 8       | (1,0,2) | 3.661                 | 0.527                     | 300      | 4.591                     | 4.146                     | 0.453                     | 4.170             | 0.273  | 0.2731    | 5  |
| 8       | (1,1,1) | 3.847                 | 0.553                     | 1000     | 4.824                     | 7.779                     | 0.642                     | 7.806             | 0.260  | 0.2599    | 3  |
| 2       | (0,0,3) | 3.929                 | 0.565                     | 1        | 4.927                     | 0.266                     | 0.255                     | 0.368             | 0.255  | 0.2545    | 9  |
| 8       | (1,1,2) | 4.466                 | 0.642                     | 2        | 5.600                     | 0.274                     | 0.252                     | 0.372             | 0.224  | 0.2239    | 6  |
| 8       | (1,0,3) | 4.688                 | 0.674                     | 167      | 5.879                     | 3.497                     | 0.430                     | 3.523             | 0.213  | 0.2133    | 10 |
| 4       | (2,0,0) | 5.116                 | 0.736                     | 244      | 6.415                     | 6.259                     | 0.593                     | 6.287             | 0.195  | 0.1955    | 4  |
| 2       | (0,0,4) | 5.238                 | 0.753                     | 114      | 6.569                     | 6.135                     | 0.589                     | 6.163             | 0.191  | 0.1909    | 16 |
| 8       | (2,0,1) | 5.281                 | 0.759                     | 1        | 6.622                     | 0.252                     | 0.247                     | 0.353             | 0.189  | 0.1894    | 5  |
| 8       | (1,1,3) | 5.341                 | 0.768                     | 434      | 6.697                     | 6.034                     | 0.585                     | 6.062             | 0.187  | 0.1872    | 11 |
| 8       | (2,1,0) | 5.720                 | 0.822                     | 98       | 7.172                     | 2.955                     | 0.408                     | 2.983             | 0.175  | 0.1748    | 5  |
| 8       | (2,0,2) | 5.747                 | 0.826                     | 355      | 7.207                     | 5.655                     | 0.571                     | 5.684             | 0.174  | 0.174     | 8  |
| 8       | (1,0,4) | 5.830                 | 0.838                     | 93       | 7.310                     | 2.904                     | 0.405                     | 2.932             | 0.172  | 0.1715    | 17 |
| 16      | (2,1,1) | 5.868                 | 0.844                     | 183      | 7.358                     | 2.886                     | 0.404                     | 2.915             | 0.170  | 0.1704    | 6  |
| 16      | (2,1,2) | 6.291                 | 0.904                     | 150      | 7.889                     | 2.700                     | 0.395                     | 2.729             | 0.159  | 0.159     | 9  |
| 8       | (1,1,4) | 6.366                 | 0.915                     | 1        | 7.983                     | 0.197                     | 0.242                     | 0.312             | 0.157  | 0.1571    | 18 |
| 8       | (2,0,3) | 6.450                 | 0.927                     | 1        | 8.089                     | 0.192                     | 0.241                     | 0.309             | 0.155  | 0.155     | 13 |
| 2       | (0,0,5) | 6.548                 | 0.941                     | 0        | 8.211                     | 0.187                     | 0.241                     | 0.305             | 0.153  | 0.1527    | 25 |
| 16      | (2,1,3) | 6.939                 | 0.998                     | 111      | 8.702                     | 2.444                     | 0.387                     | 2.474             | 0.144  | 0.1441    | 14 |
| 8       | (1,0,5) | 7.030                 | 1.011                     | 54       | 8.816                     | 2.410                     | 0.385                     | 2.441             | 0.142  | 0.1422    | 26 |



**Table S6.** Crystal structure results obtained from TEM for the BSC phase.

| Multi | (h,k,l) | d* / nm <sup>-1</sup> | $\Theta_{\text{Scatt}}$ / Deg. | Intens | $\Theta_{\text{Bragg}}$ / mRad | V <sub>r</sub> [V  nm  e] | V <sub>i</sub> [V  nm  e] | Ampli. [V  nm  e] | d / nm | LP factor | s  |
|-------|---------|-----------------------|--------------------------------|--------|--------------------------------|---------------------------|---------------------------|-------------------|--------|-----------|----|
| 1     | (0,0,0) | 0.000                 | 0.000                          |        | 0.000                          | 28.782                    | 2.090                     | 28.858            |        |           |    |
| 6     | (1,0,0) | 2.084                 | 0.300                          | 168    | 2.613                          | 4.877                     | 0.693                     | 4.926             | 0.480  | 0.480     | 1  |
| 6     | (1,1,0) | 3.609                 | 0.519                          | 69     | 4.525                          | 4.112                     | 0.659                     | 4.165             | 0.277  | 0.277     | 2  |
| 6     | (2,0,0) | 4.167                 | 0.599                          | 1000   | 5.225                          | 16.942                    | 1.342                     | 16.995            | 0.240  | 0.240     | 4  |
| 2     | (0,0,2) | 4.232                 | 0.609                          | 321    | 5.307                          | 16.749                    | 1.337                     | 16.805            | 0.236  | 0.236     | 4  |
| 12    | (1,0,2) | 4.717                 | 0.678                          | 77     | 5.915                          | 3.482                     | 0.631                     | 3.539             | 0.212  | 0.212     | 5  |
| 12    | (2,1,0) | 5.513                 | 0.793                          | 51     | 6.913                          | 3.060                     | 0.610                     | 3.121             | 0.184  | 0.181     | 5  |
| 12    | (1,1,2) | 5.562                 | 0.800                          | 50     | 6.974                          | 3.036                     | 0.609                     | 3.096             | 0.188  | 0.179     | 6  |
| 12    | (2,0,2) | 5.939                 | 0.854                          | 783    | 7.448                          | 12.636                    | 1.197                     | 12.692            | 0.168  | 0.168     | 8  |
| 6     | (3,0,0) | 6.251                 | 0.899                          | 18     | 7.838                          | 2.711                     | 0.589                     | 2.775             | 0.160  | 0.160     | 9  |
| 24    | (2,1,2) | 6.950                 | 0.999                          | 51     | 8.715                          | 2.419                     | 0.579                     | 2.488             | 0.149  | 0.143     | 9  |
| 6     | (2,2,0) | 7.218                 | 1.038                          | 221    | 9.051                          | 10.446                    | 1.116                     | 10.506            | 0.139  | 0.138     | 8  |
| 12    | (3,1,0) | 7.512                 | 1.080                          | 20     | 9.420                          | 2.210                     | 0.564                     | 2.281             | 0.133  | 0.133     | 10 |
| 12    | (3,0,2) | 7.548                 | 1.085                          | 20     | 9.466                          | 2.197                     | 0.563                     | 2.268             | 0.132  | 0.132     | 13 |
| 6     | (4,0,0) | 8.334                 | 1.198                          | 139    | 10.451                         | 8.905                     | 1.043                     | 8.966             | 0.120  | 0.120     | 16 |
| 12    | (2,2,2) | 8.367                 | 1.203                          | 275    | 10.492                         | 8.864                     | 1.041                     | 8.925             | 0.120  | 0.119     | 12 |
| 2     | (0,0,4) | 8.464                 | 1.217                          | 44     | 10.614                         | 8.743                     | 1.034                     | 8.804             | 0.118  | 0.118     | 16 |
| 24    | (3,1,2) | 8.622                 | 1.240                          | 25     | 10.812                         | 1.855                     | 0.533                     | 1.930             | 0.116  | 0.116     | 14 |
| 12    | (1,0,4) | 8.716                 | 1.253                          | 12     | 10.930                         | 1.828                     | 0.531                     | 1.904             | 0.115  | 0.114     | 17 |
| 12    | (3,2,0) | 9.082                 | 1.306                          | 10     | 11.389                         | 1.728                     | 0.521                     | 1.805             | 0.110  | 0.110     | 13 |
| 12    | (1,1,4) | 9.201                 | 1.323                          | 10     | 11.538                         | 1.697                     | 0.517                     | 1.774             | 0.109  | 0.108     | 18 |
| 12    | (4,0,2) | 9.347                 | 1.344                          | 187    | 11.721                         | 7.716                     | 0.978                     | 7.778             | 0.107  | 0.107     | 20 |
| 12    | (2,0,4) | 9.434                 | 1.356                          | 181    | 11.830                         | 7.622                     | 0.973                     | 7.684             | 0.106  | 0.106     | 20 |

|    |             |            |           |    |            |       |       |       |           |            |        |
|----|-------------|------------|-----------|----|------------|-------|-------|-------|-----------|------------|--------|
| 12 | (4,1,0<br>) | 9.548      | 1.37<br>3 | 9  | 11.97<br>3 | 1.610 | 0.507 | 1.688 | 0.10<br>5 | 0.104<br>7 | 1<br>7 |
| 24 | (3,2,2<br>) | 10.02<br>0 | 1.44<br>0 | 14 | 12.56<br>5 | 1.500 | 0.494 | 1.580 | 0.10<br>0 | 0.099<br>8 | 1<br>7 |

**Table S7.** Summary of the stability testing results of our SOECs with the hybrid electrode

| <b>Operation</b>   | <b>Fuel humidity</b>                        | <b>Current density</b> | <b>Temperature</b> | <b>Degradation rate</b> |
|--------------------|---------------------------------------------|------------------------|--------------------|-------------------------|
| <b>Discharging</b> | 3% humidified H <sub>2</sub>                | 0.8 A cm <sup>-2</sup> | 650 °C             | 2 mV/h                  |
|                    | 3% humidified H <sub>2</sub>                | 0.2 A cm <sup>-2</sup> | 550 °C             | 1 mV/h                  |
|                    | 3% humidified C <sub>3</sub> H <sub>8</sub> | 0.4 A cm <sup>-2</sup> | 600 °C             | 8 mV/h                  |
| <b>Charging</b>    | 40% humidified H <sub>2</sub>               | 0.8 A cm <sup>-2</sup> | 650 °C             | 3 mV/h                  |
|                    | 40% humidified H <sub>2</sub>               | 3.0 A cm <sup>-2</sup> | 650 °C             | 8 mV/h                  |
|                    | 40% humidified H <sub>2</sub>               | 5.0 A cm <sup>-2</sup> | 750 °C             | 4 mV/min                |

## References

- 1 H. Shimada, T. Yamaguchi, H. Kishimoto, H. Sumi, Y. Yamaguchi, K. Nomura and Y. Fujishiro, *Nat Commun*, 2019, **10**, 5432.
- 2 S.-L. Zhang, H. Wang, M. Y. Lu, A.-P. Zhang, L. V. Mogni, Q. Liu, C.-X. Li, C.-J. Li and S. A. Barnett, *Energy Environ. Sci.*, 2018, **11**, 1870–1879.
- 3 Z. Teng, Z. Xiao, G. Yang, L. Guo, X. Yang, R. Ran, W. Wang, W. Zhou and Z. Shao, *Materials Today Energy*, 2020, **17**, 100458.
- 4 T. Chen, Y. Zhou, M. Liu, C. Yuan, X. Ye, Z. Zhan and S. Wang, *Electrochemistry Communications*, 2015, **54**, 23–27.
- 5 H. Yu, H. Im and K. T. Lee, *Adv Funct Materials*, 2022, 2207725.
- 6 B.-H. Yun, K. J. Kim, D. W. Joh, M. S. Chae, J. J. Lee, D. Kim, S. Kang, D. Choi, S.-T. Hong and K. T. Lee, *J. Mater. Chem. A*, 2019, **7**, 20558–20566.
- 7 J. H. Park, C. H. Jung, K. J. Kim, D. Kim, H. R. Shin, J.-E. Hong and K. T. Lee, *ACS Appl. Mater. Interfaces*, 2021, **13**, 2496–2506.
- 8 J. Kim, S. Im, S. H. Oh, J. Y. Lee, K. J. Yoon, J.-W. Son, S. Yang, B.-K. Kim, J.-H. Lee, H.-W. Lee, J.-H. Lee and H.-I. Ji, *Sci. Adv.*, 2021, **7**, eabj8590.
- 9 J. Yan, Z. Zhao, L. Shang, D. Ou and M. Cheng, *Journal of Power Sources*, 2016, **319**, 124–130.
- 10 B.-K. Park, R. Scipioni, Q. Zhang, D. Cox, P. W. Voorhees and S. A. Barnett, *J. Mater. Chem. A*, 2020, **8**, 11687–11694.
- 11 G. Li, Y. Gou, X. Cheng, Z. Bai, R. Ren, C. Xu, J. Qiao, W. Sun, Z. Wang and K. Sun, *ACS Appl. Mater. Interfaces*, 2021, **13**, 34282–34291.
- 12 K. Joong Yoon, M. Biswas, H.-J. Kim, M. Park, J. Hong, H. Kim, J.-W. Son, J.-H. Lee, B.-K. Kim and H.-W. Lee, *Nano Energy*, 2017, **36**, 9–20.
- 13 Z. Li, B. Yang, B. Qian, S. Wang, Y. Zheng, L. Ge and H. Chen, *Separation and Purification Technology*, 2023, **308**, 123002.
- 14 K. T. Bae, I. Jeong, D. Kim, H. Yu, H.-N. Im, A. Akromjon, C.-W. Lee and K. T. Lee, *Chemical Engineering Journal*, 2023, **461**, 142051.
- 15 T. Liu, Y. Wang, Y. Zhang, S. Fang, L. Lei, C. Ren and F. Chen, *Electrochemistry Communications*, 2015, **61**, 106–109.
- 16 D. Kim, J. W. Park, M. S. Chae, I. Jeong, J. H. Park, K. J. Kim, J. J. Lee, C. Jung, C.-W. Lee, S.-T. Hong and K. T. Lee, *J. Mater. Chem. A*, 2021, **9**, 5507–5521.
- 17 Y. Tan, A. Wang, L. Jia, D. Yan, B. Chi, J. Pu and J. Li, *International Journal of Hydrogen Energy*, 2017, **42**, 4456–4464.
- 18 D. Heidari, S. Javadpour and S. H. Chan, *Energy Conversion and Management*, 2017, **136**, 78–84.
- 19 M. A. Laguna-Bercero, H. Monzón, A. Larrea and V. M. Orera, *J. Mater. Chem. A*, 2016, **4**, 1446–1453.
- 20 M.-B. Choi, B. Singh, E. D. Wachsman and S.-J. Song, *Journal of Power Sources*, 2013, **239**, 361–373.
- 21 H.-J. Choi, Y.-H. Na, M. Kwak, T. W. Kim, D.-W. Seo, S.-K. Woo and S.-D. Kim, *Ceramics International*, 2017, **43**, 13653–13660.
- 22 K. J. Kim, I. Thaheem, I. Jeong, H. Yu, J. H. Park and K. T. Lee, *Journal of Power Sources*, 2022, **539**, 231611.
- 23 Y. Tian, W. Wang, Y. Liu, L. Zhang, L. Jia, J. Yang, B. Chi, J. Pu and J. Li, *ACS Appl. Energy Mater.*, 2019, **2**, 3297–3305.

- 24 Z. Yue, L. Jiang, Z. Chen, N. Ai, Y. Zou, S. P. Jiang, C. Guan, X. Wang, Y. Shao, H. Fang, Y. Luo and K. Chen, *ACS Appl. Mater. Interfaces*, 2023, **15**, 8138–8148.
- 25 Y. Niu, Y. Zhou, W. Lv, Y. Chen, Y. Zhang, W. Zhang, Z. Luo, N. Kane, Y. Ding, L. Soule, Y. Liu, W. He and M. Liu, *Adv. Funct. Mater.*, 2021, **31**, 2100034.
- 26 B.-K. Park and S. A. Barnett, *J. Mater. Chem. A*, 2020, **8**, 11626–11631.
- 27 X. Tong, Y. Xu, Đ. Tripković, P. V. Hendriksen, W.-R. Kiebach and M. Chen, *J. Mater. Chem. A*, 2020, **8**, 9039–9048.
- 28 Z. Chen, L. Jiang, S. He, C. Guan, Y. Zou, Z. Yue, N. Ai, S. P. Jiang, Y. Shao and K. Chen, *Applied Catalysis B: Environmental*, 2022, **305**, 121056.
- 29 K. Chen, N. Li, N. Ai, M. Li, Y. Cheng, W. D. A. Rickard, J. Li and S. P. Jiang, *J. Mater. Chem. A*, 2016, **4**, 17678–17685.
- 30 H. Liu, X. Zhu, M. Cheng, Y. Cong and W. Yang, *Chem. Commun.*, 2011, **47**, 2378–2380.
- 31 L. Zhang, D. Li and S. Zhang, *Ceramics International*, 2017, **43**, 2859–2863.
- 32 Y. Zhu, W. Zhou, Y. Chen and Z. Shao, *Angew. Chem. Int. Ed.*, 2016, **55**, 8988–8993.
- 33 Y. Liu, Y. Tian, W. Wang, Y. Li, S. Chattopadhyay, B. Chi and J. Pu, *ACS Appl. Mater. Interfaces*, 2020, **12**, 57941–57949.
- 34 Y. Tian, W. Wang, Y. Liu, A. Naden, M. Xu, S. Wu, B. Chi, J. Pu and J. T. S. Irvine, *ACS Catal.*, 2021, **11**, 3704–3714.
- 35 X. Xi, Z.-S. Cao, X.-Q. Shen, Y. Lu, J. Li, J.-L. Luo and X.-Z. Fu, *Journal of Power Sources*, 2020, **459**, 228071.
- 36 K.-Y. Lai and A. Manthiram, *Chem. Mater.*, 2018, **30**, 2515–2525.
- 37 O. Kwon, S. Sengodan, K. Kim, G. Kim, H. Y. Jeong, J. Shin, Y.-W. Ju, J. W. Han and G. Kim, *Nat Commun*, 2017, **8**, 15967.
- 38 C. Yang, J. Li, Y. Lin, J. Liu, F. Chen and M. Liu, *Nano Energy*, 2015, **11**, 704–710.
- 39 S. Sengodan, S. Choi, A. Jun, T. H. Shin, Y.-W. Ju, H. Y. Jeong, J. Shin, J. T. S. Irvine and G. Kim, *Nature Mater*, 2015, **14**, 205–209.
- 40 Z. Wang, Z. Wang, W. Yang, R. Peng and Y. Lu, *Journal of Power Sources*, 2014, **255**, 404–409.
- 41 L. Yang, Y. Choi, W. Qin, H. Chen, K. Blinn, M. Liu, P. Liu, J. Bai, T. A. Tyson and M. Liu, *Nat Commun*, 2011, **2**, 357.
- 42 Z. Zhan and S. Barnett, *Solid State Ionics*, 2005, **176**, 871–879.
- 43 L. Zhang, C. Yang, A. I. Frenkel, S. Wang, G. Xiao, K. Brinkman and F. Chen, *Journal of Power Sources*, 2014, **262**, 421–428.
- 44 M. Qin, T. Tan, K. Li, Z. Wang, H. Yang, Z. Liu, M. Zhou, T. Liu, C. Yang and M. Liu, *International Journal of Hydrogen Energy*, 2020, **45**, 21464–21472.
